# Supplementary material for: Exploring the Relationship between Melioidosis Morbidity Rate and Local Environmental Indicators Using Remotely Sensed Data
Source: Preprints.org preprint supplement (doi:10.20944/preprints202404.0446.v1), 2024-04-05
Supplement: Supplementary file 1 [file supplementary]

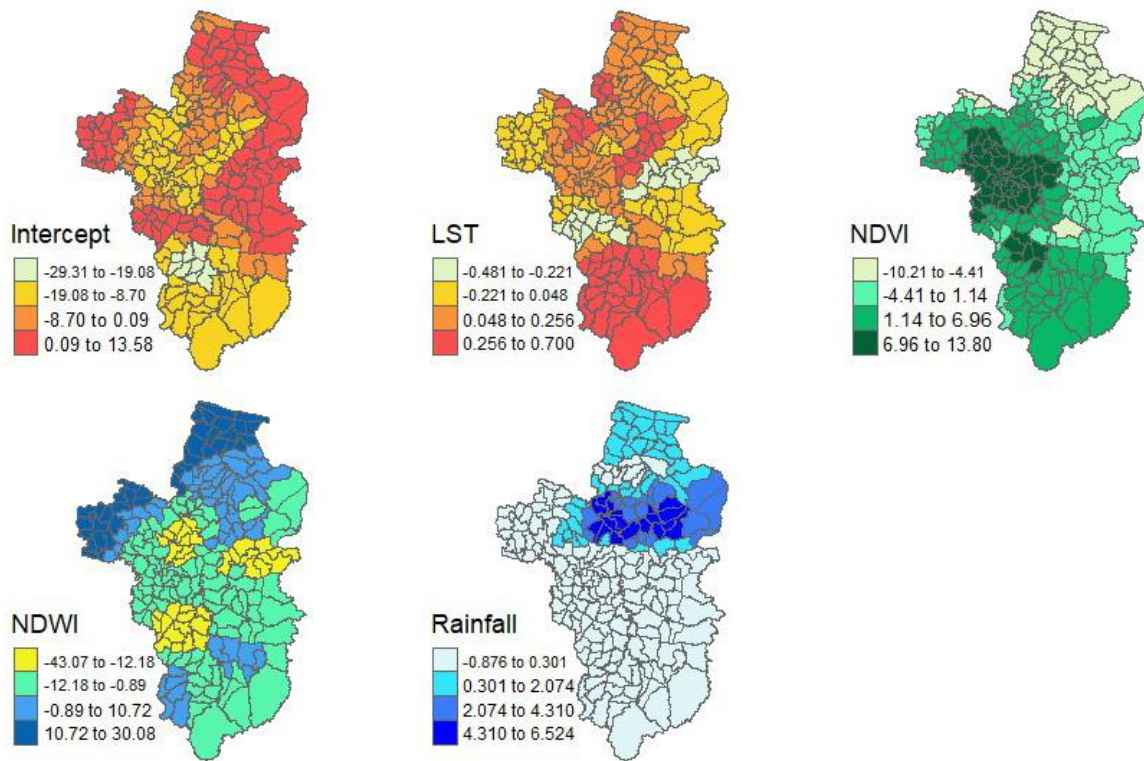

**Figure S1.** The spatial variation of the coefficients of GWPR model in January

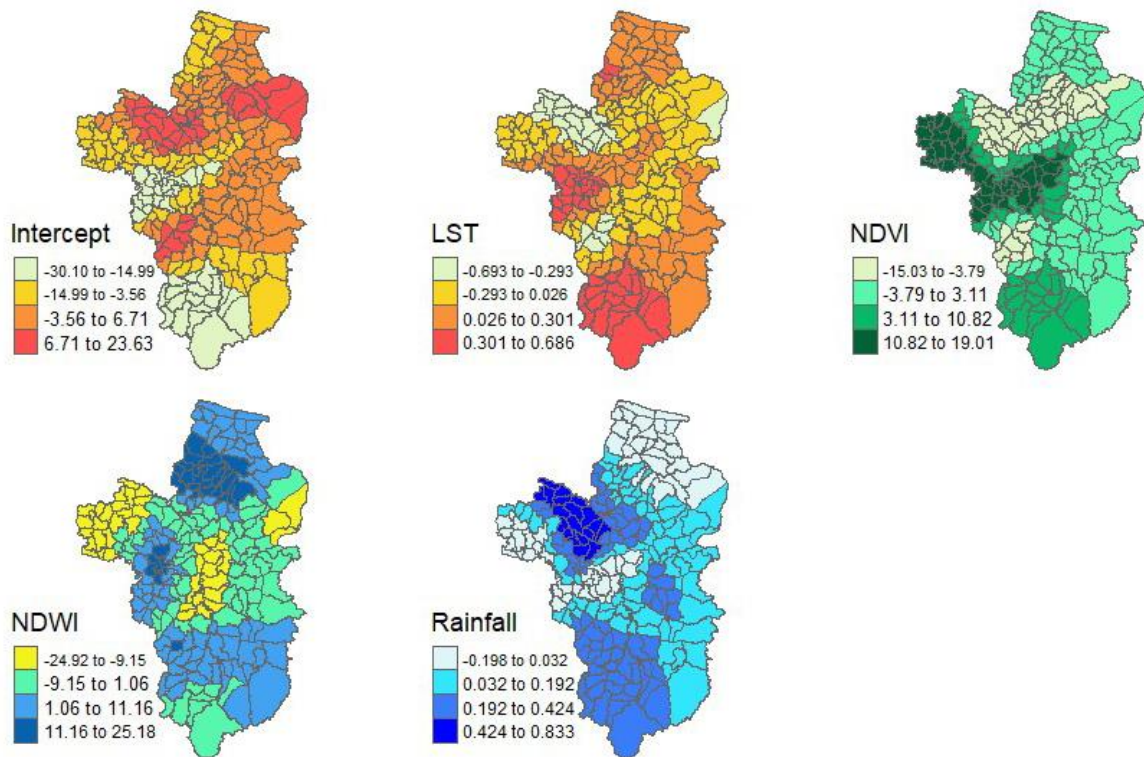

**Figure S2.** The spatial variation of the coefficients of GWPR model in February

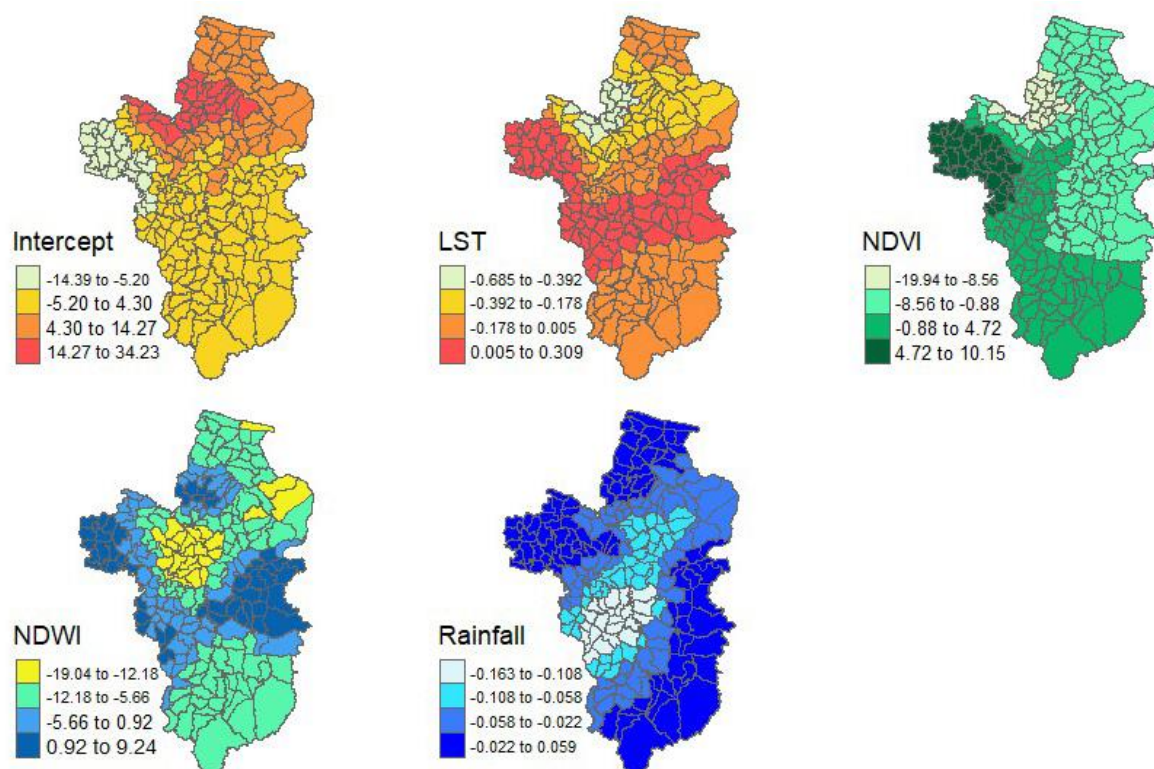

**Figure S3.** The spatial variation of the coefficients of GWPR model in March

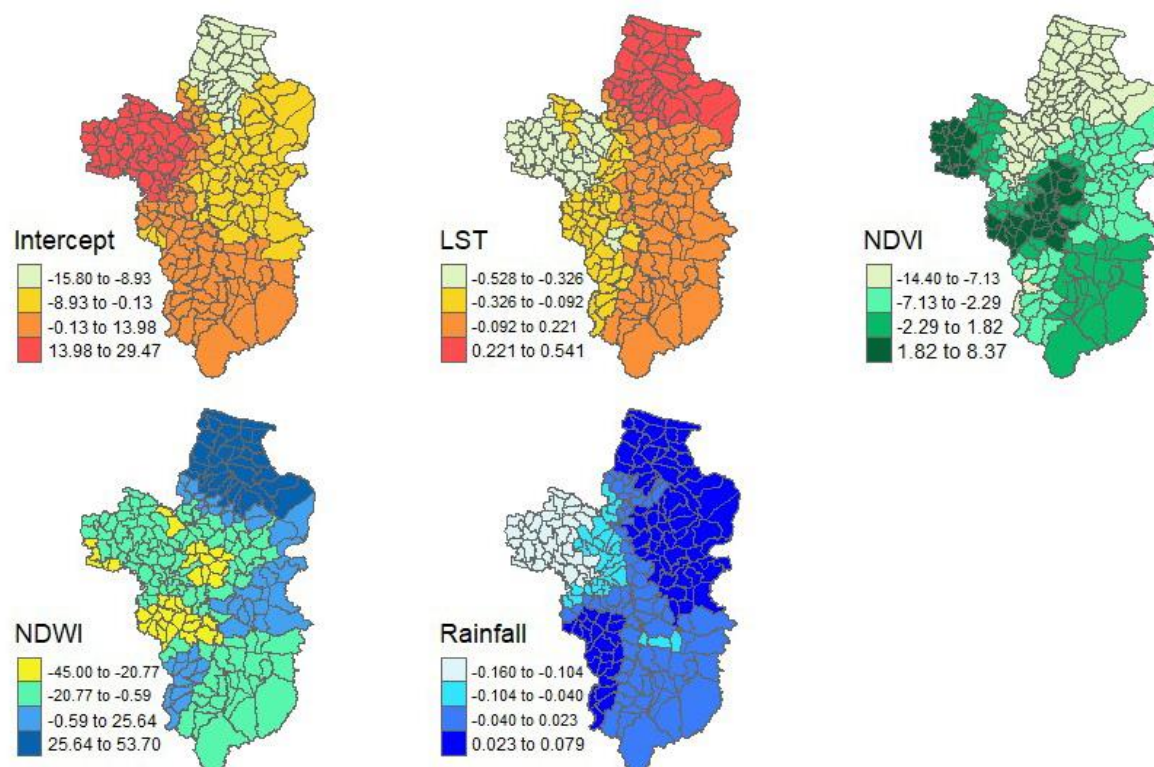

**Figure S4.** The spatial variation of the coefficients of GWPR model in April



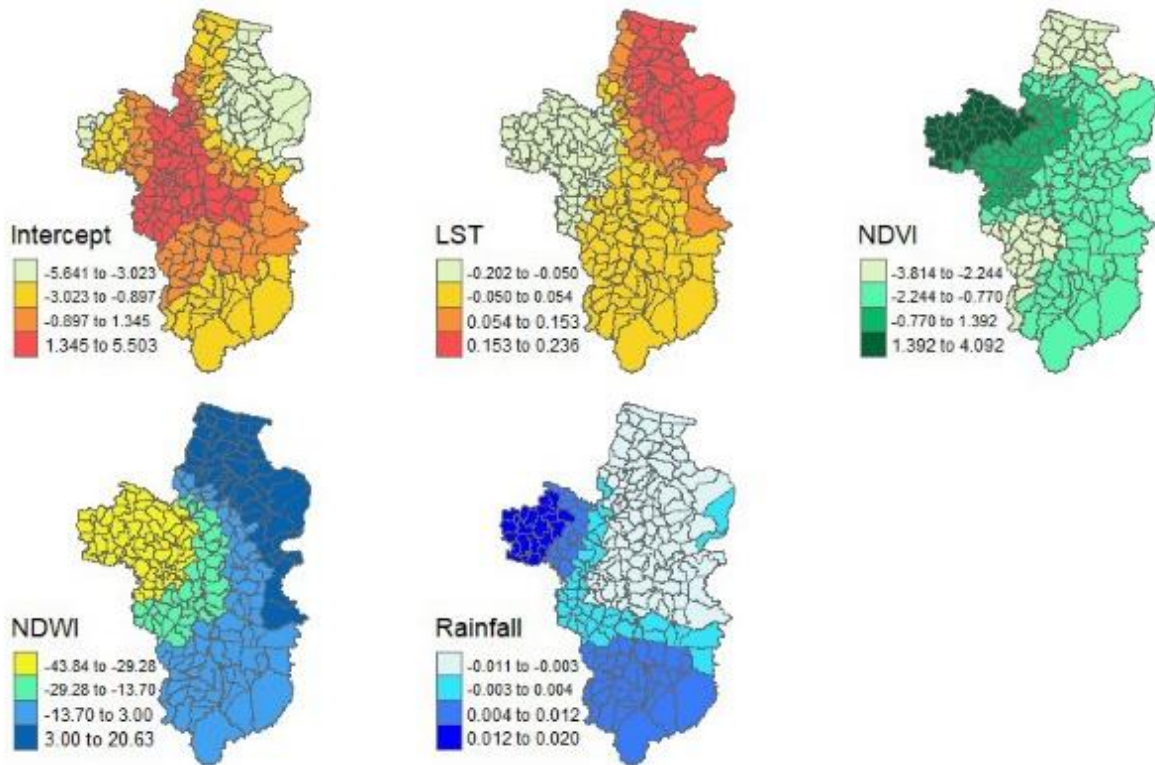

**Figure S5.** The spatial variation of the coefficients of GWPR model in May

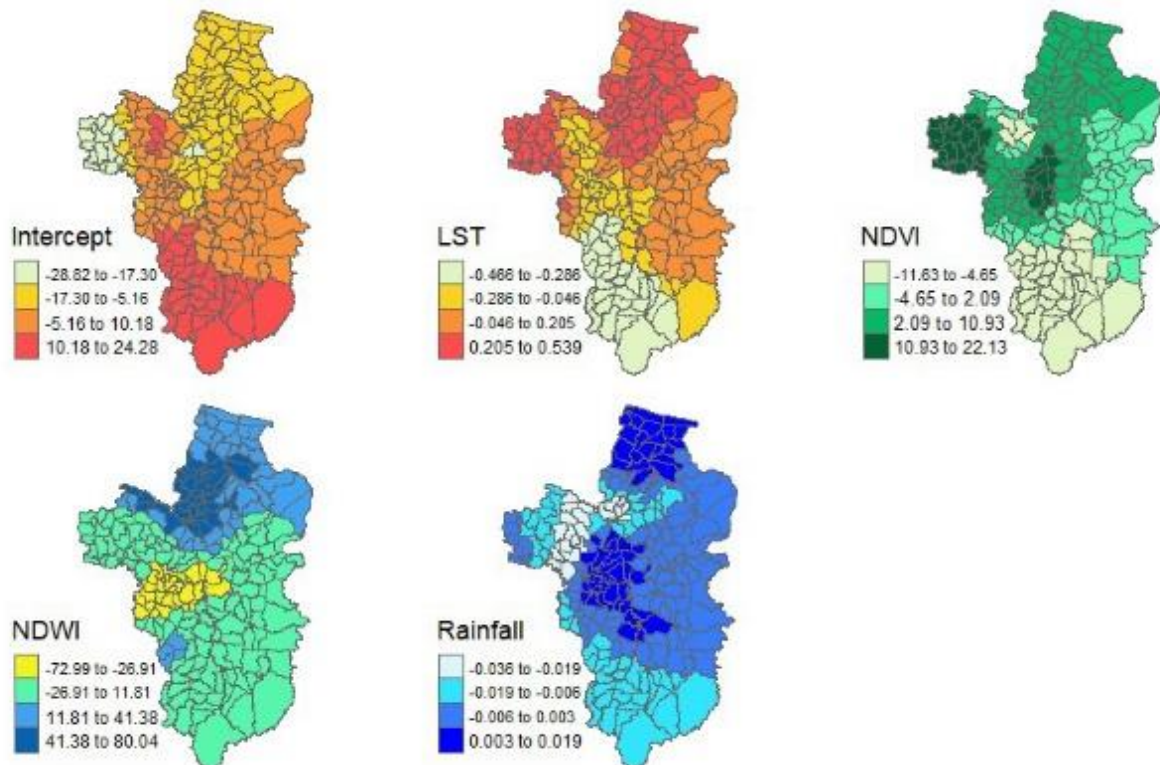

**Figure S6.** The spatial variation of the coefficients of GWPR model in June

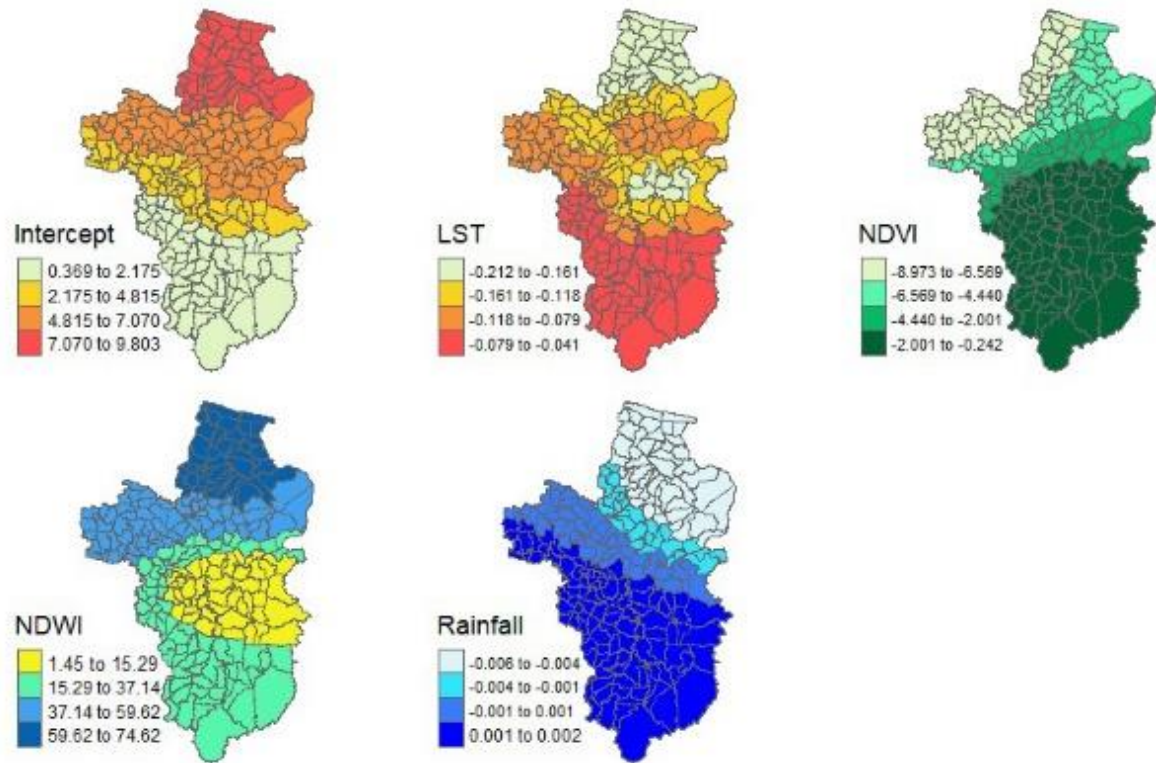

**Figure S7.** The spatial variation of the coefficients of GWPR model in July

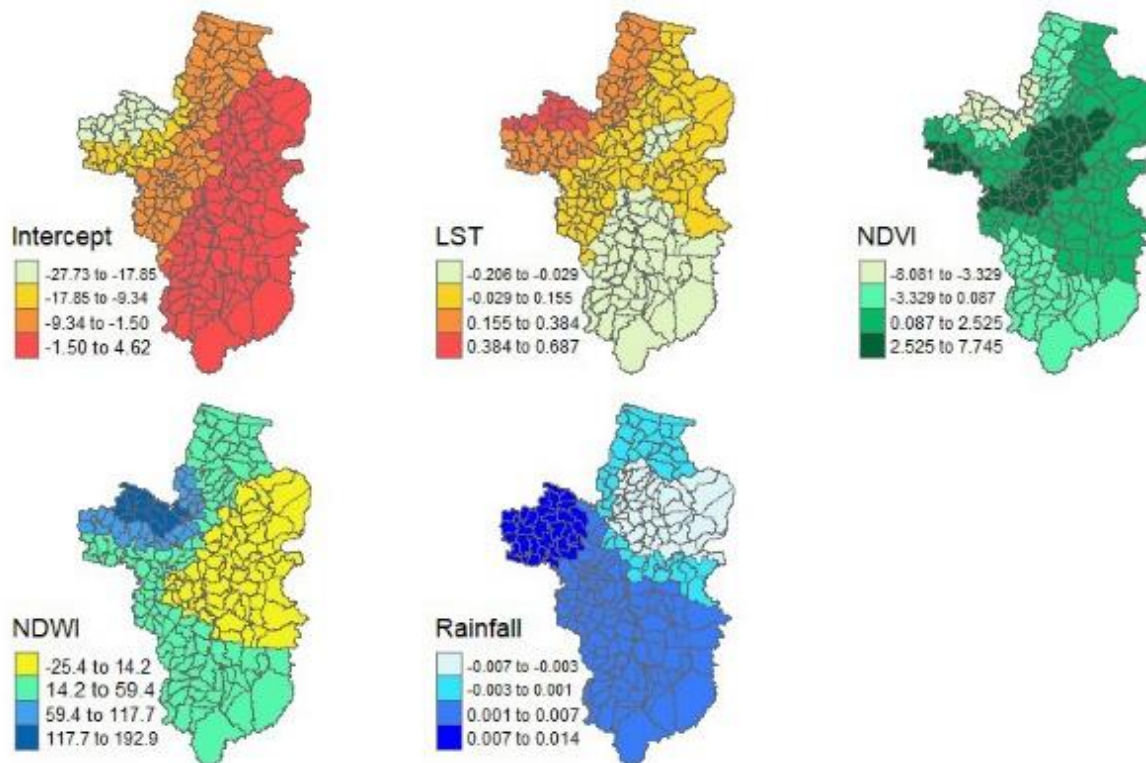

**Figure S8.** The spatial variation of the coefficients of GWPR model in August



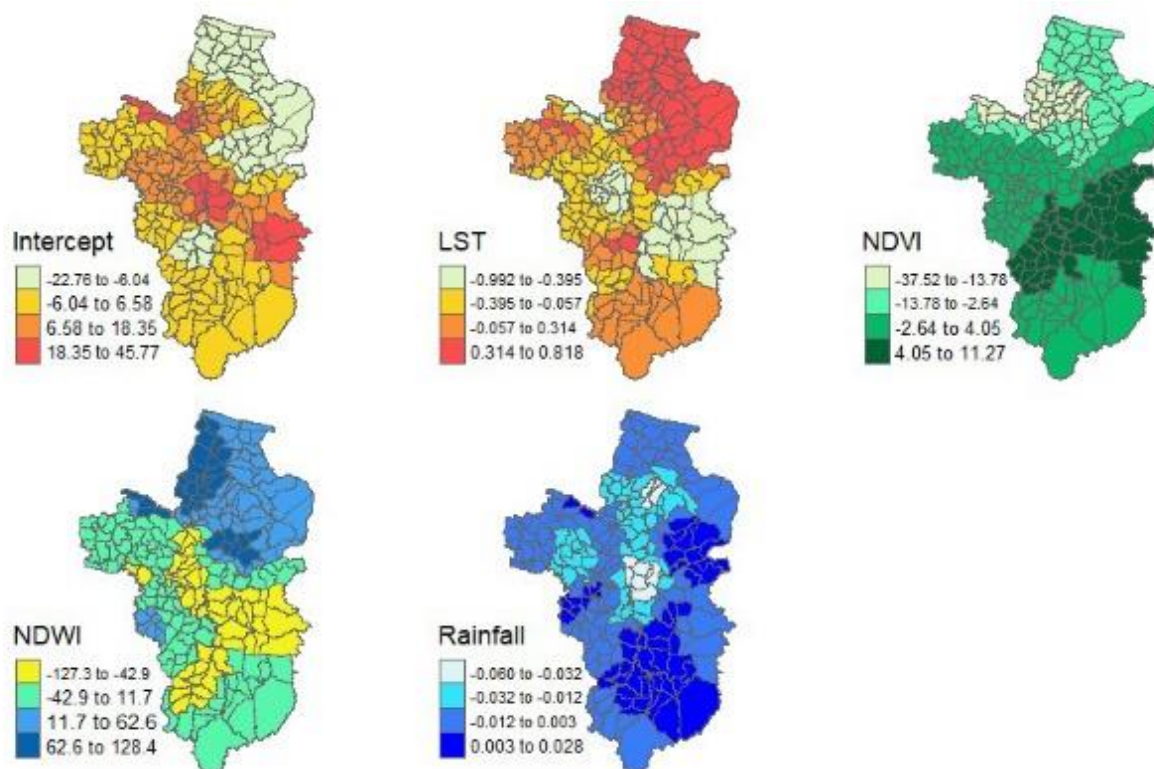

**Figure S9.** The spatial variation of the coefficients of GWPR model in September

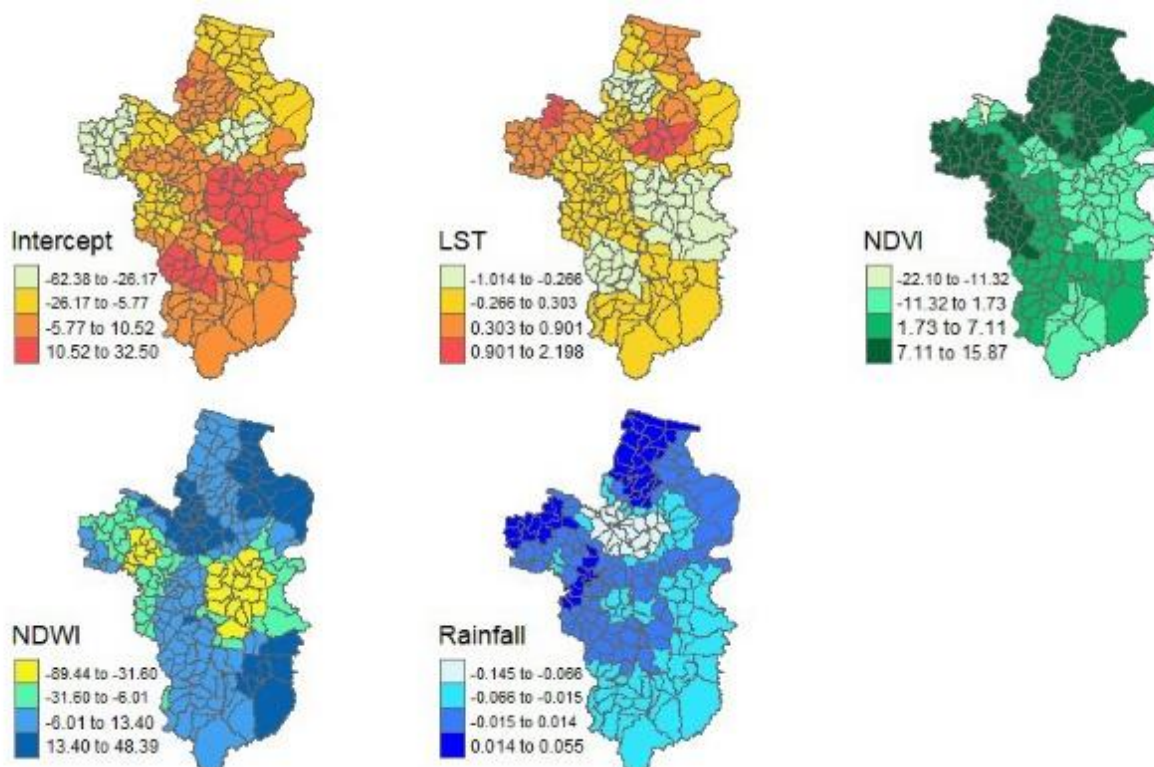

**Figure S10.** The spatial variation of the coefficients of GWPR model in October

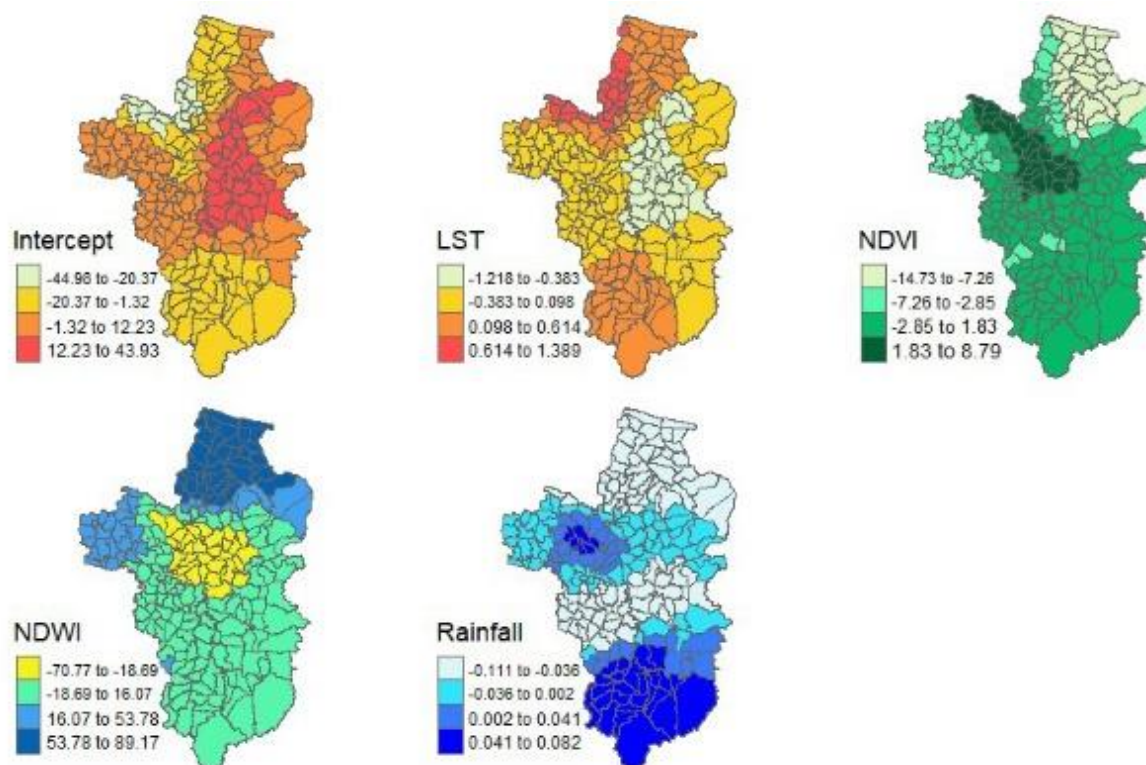

**Figure S11.** The spatial variation of the coefficients of GWPR model in November

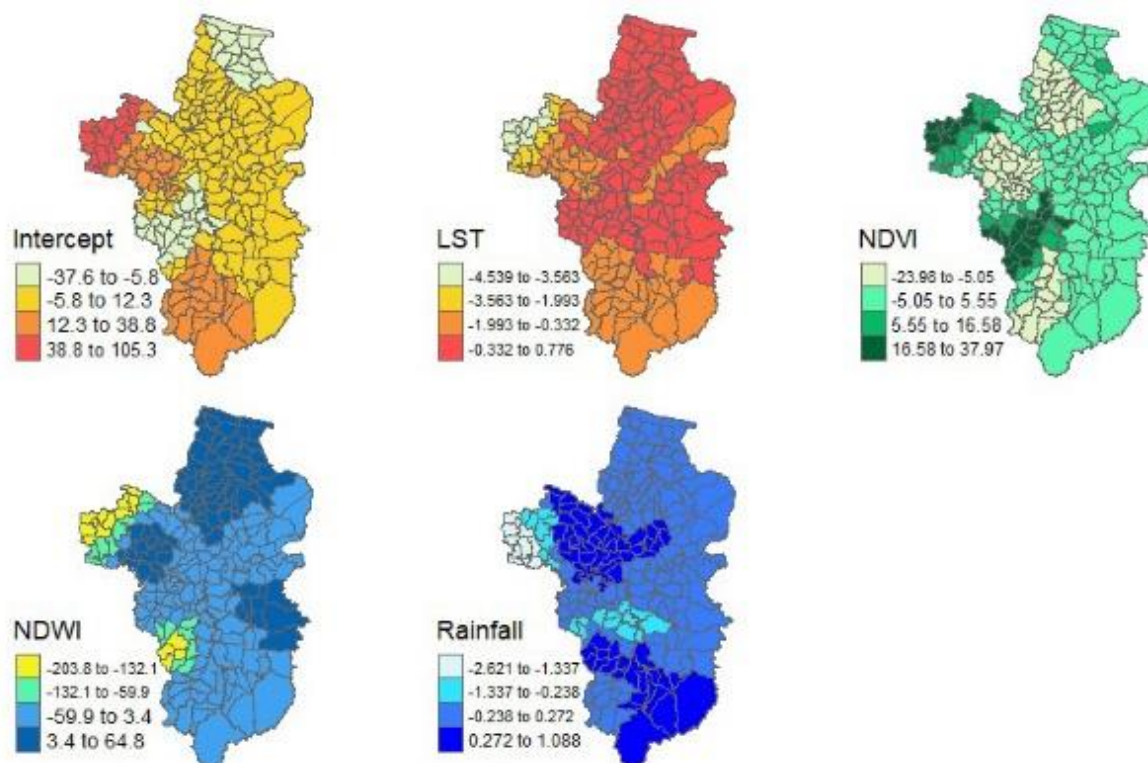

**Figure S12.** The spatial variation of the coefficients of GWPR model in December
