# Supplementary material for: Exploring the Relationship between Melioidosis Morbidity Rate and Local Environmental Indicators Using Remotely Sensed Data
Source: Preprints.org preprint supplement (doi:10.20944/preprints202404.0446.v1), 2024-04-05
Supplement: Supplementary file 2 [file supplementary]

### Supplementary Information

**Table S1.** Results of parameter estimates in the GPR and GWPR per Month.

| Variable        | GPR      |            |         |          |       | GWPR    |         |         |
|-----------------|----------|------------|---------|----------|-------|---------|---------|---------|
|                 | Estimate | Std. Error | z value | P-value  | VIF   | Minimum | Median  | Maximum |
| <b>January</b>  |          |            |         |          |       |         |         |         |
| Intercept       | 4.035    | 1.388      | 2.906   | 0.003*   | -     | -29.306 | -4.546  | 13.577  |
| LST_1           | -0.091   | 0.047      | -1.903  | 0.056    | 3.315 | -0.480  | 0.135   | 0.700   |
| NDVI_1          | -1.852   | 0.692      | -2.676  | 0.007*   | 1.746 | -10.206 | 1.820   | 13.798  |
| NDWI_1          | -11.095  | 2.630      | -4.217  | <0.0001* | 3.054 | -43.066 | -2.329  | 30.076  |
| RAIN_1          | -0.178   | 0.031      | -5.746  | <0.0001* | 1.143 | -0.876  | 0.077   | 6.524   |
| <b>February</b> |          |            |         |          |       |         |         |         |
| Intercept       | -0.300   | 1.999      | -0.150  | 0.880    | -     | -30.095 | -2.289  | 23.633  |
| LST_2           | -0.018   | 0.061      | -0.295  | 0.767    | 3.496 | -0.692  | 0.046   | 0.686   |
| NDVI_2          | -1.322   | 0.987      | -1.339  | 0.180    | 1.758 | -15.031 | -0.055  | 19.014  |
| NDWI_2          | -3.014   | 3.775      | -0.798  | 0.424    | 4.292 | -24.921 | 1.340   | 25.184  |
| RAIN_2          | 0.212    | 0.032      | 6.479   | <0.0001* | 1.250 | -0.197  | 0.160   | 0.833   |
| <b>March</b>    |          |            |         |          |       |         |         |         |
| Intercept       | 6.135    | 1.974      | 3.107   | 0.001*   | -     | -14.387 | 2.804   | 34.225  |
| LST_3           | -0.157   | 0.060      | -2.603  | 0.009*   | 3.804 | -0.685  | -0.082  | 0.308   |
| NDVI_3          | -1.265   | 1.122      | -1.127  | 0.259    | 2.191 | -19.936 | -0.193  | 10.151  |
| NDWI_3          | -12.481  | 4.072      | -3.064  | 0.002*   | 4.340 | -19.037 | -6.077  | 9.244   |
| RAIN_3          | -0.023   | 0.014      | -1.626  | 0.103    | 1.033 | -0.162  | -0.025  | 0.058   |
| <b>April</b>    |          |            |         |          |       |         |         |         |
| Intercept       | -2.185   | 2.127      | -1.027  | 0.304    | -     | -15.795 | 1.762   | 29.470  |
| LST_4           | 0.110    | 0.061      | 1.784   | 0.074    | 3.822 | -0.527  | -0.054  | 0.541   |
| NDVI_4          | -1.615   | 1.244      | -1.298  | 0.194    | 2.342 | -14.398 | -3.555  | 8.367   |
| NDWI_4          | 4.658    | 6.133      | 0.759   | 0.447    | 5.096 | -44.996 | -6.519  | 53.702  |
| RAIN_4          | -0.010   | 0.011      | -0.900  | 0.367    | 1.113 | -0.160  | 0.005   | 0.078   |
| <b>May</b>      |          |            |         |          |       |         |         |         |
| Intercept       | 1.929    | 2.270      | 0.850   | 0.395    | -     | -5.640  | -0.546  | 5.502   |
| LST_5           | 0.003    | 0.054      | 0.069   | 0.944    | 2.459 | -0.201  | 0.004   | 0.236   |
| NDVI_5          | -1.831   | 0.982      | -1.863  | 0.062    | 2.420 | -3.813  | -1.581  | 4.092   |
| NDWI_5          | -4.794   | 5.942      | -0.806  | 0.419    | 3.757 | -43.837 | -10.219 | 20.632  |
| RAIN_5          | -0.003   | 0.003      | -1.136  | 0.255    | 1.242 | -0.011  | -0.003  | 0.020   |
| <b>June</b>     |          |            |         |          |       |         |         |         |
| Intercept       | 1.294    | 1.620      | 0.798   | 0.424    | -     | -28.823 | -2.625  | 24.282  |
| LST_6           | 0.019    | 0.043      | 0.449   | 0.653    | 1.607 | -0.466  | 0.073   | 0.539   |
| NDVI_6          | -1.499   | 0.745      | -2.011  | 0.044*   | 1.088 | -11.629 | 3.209   | 22.125  |
| NDWI_6          | 12.079   | 5.352      | 2.256   | 0.024*   | 1.573 | -72.993 | 4.1483  | 80.041  |
| RAIN_6          | -0.001   | 0.001      | -1.403  | 0.160    | 1.326 | -0.035  | -0.001  | 0.018   |
| <b>July</b>     |          |            |         |          |       |         |         |         |
| Intercept       | 5.593    | 1.882      | 2.971   | 0.002*   | -     | 0.368   | 5.140   | 9.802   |
| LST_7           | -0.143   | 0.059      | -2.412  | 0.015*   | 1.330 | -0.211  | -0.110  | -0.040  |
| NDVI_7          | -4.842   | 0.605      | -7.994  | <0.0001* | 1.187 | -8.973  | -3.195  | -0.241  |
| NDWI_7          | 64.235   | 8.055      | 7.974   | <0.0001* | 1.134 | 1.447   | 31.425  | 74.617  |
| RAIN_7          | -0.001   | 0.0007     | -1.950  | 0.051    | 1.322 | -0.005  | 0.0008  | 0.002   |
| <b>August</b>   |          |            |         |          |       |         |         |         |
| Intercept       | -8.249   | 1.928      | -4.277  | <0.0001* | -     | -27.725 | -2.808  | 4.620   |
| LST_8           | 0.237    | 0.056      | 4.207   | <0.0001* | 1.240 | -0.206  | 0.045   | 0.687   |
| NDVI_8          | -2.874   | 0.625      | -4.595  | <0.0001* | 1.167 | -8.081  | 0.720   | 7.744   |
| NDWI_8          | 72.880   | 9.152      | 7.963   | <0.0001* | 1.238 | -25.417 | 34.014  | 192.858 |
| RAIN_8          | 0.002    | 0.0006     | 4.110   | <0.0001* | 1.248 | -0.006  | 0.003   | 0.014   |

**Table S1.** Results of parameter estimates in the GPR and GWPR in Month. (Con.)

| Variable         | GPR      |            |         |          |       | GWPR     |         |         |
|------------------|----------|------------|---------|----------|-------|----------|---------|---------|
|                  | Estimate | Std. Error | z value | P-value  | VIF   | Minimum  | Median  | Maximum |
| <b>September</b> |          |            |         |          |       |          |         |         |
| Intercept        | 1.372    | 2.643      | 0.519   | 0.603    | -     | -22.759  | 2.068   | 45.772  |
| LST_9            | 0.000    | 0.079      | 0.001   | 0.998    | 1.258 | -0.992   | 0.033   | 0.817   |
| NDVI_9           | 3.673    | 0.910      | 4.034   | <0.0001* | 1.313 | -37.523  | 0.705   | 11.266  |
| NDWI_9           | -1.215   | 8.055      | -0.150  | 0.880    | 1.450 | -127.278 | -8.659  | 128.350 |
| RAIN_9           | -0.007   | 0.001      | -5.269  | <0.0001* | 1.137 | -0.059   | -0.003  | 0.028   |
| <b>October</b>   |          |            |         |          |       |          |         |         |
| Intercept        | 6.709    | 3.362      | 1.995   | 0.046*   | -     | -62.382  | -2.948  | 32.500  |
| LST_10           | -0.178   | 0.100      | -1.774  | 0.075    | 1.688 | -1.013   | 0.056   | 2.198   |
| NDVI_10          | 1.474    | 0.968      | 1.522   | 0.127    | 1.331 | -22.095  | 6.686   | 15.871  |
| NDWI_10          | 2.153    | 4.884      | 0.440   | 0.659    | 1.578 | -89.435  | 1.9126  | 48.391  |
| RAIN_10          | -0.019   | 0.002      | -7.456  | <0.0001* | 1.251 | -0.144   | -0.006  | 0.054   |
| <b>November</b>  |          |            |         |          |       |          |         |         |
| Intercept        | 6.705    | 2.725      | 2.460   | 0.013*   | -     | -44.975  | 1.991   | 43.933  |
| LST_11           | -0.167   | 0.084      | -1.991  | 0.046*   | 2.354 | -1.218   | -0.018  | 1.389   |
| NDVI_11          | -1.119   | 0.830      | -1.347  | 0.177    | 2.036 | -14.731  | -0.823  | 8.788   |
| NDWI_11          | -1.603   | 4.932      | -0.324  | 0.745    | 2.564 | -70.773  | 4.952   | 89.168  |
| RAIN_11          | -0.035   | 0.012      | -2.949  | 0.003*   | 1.189 | -0.110   | -0.023  | 0.082   |
| <b>December</b>  |          |            |         |          |       |          |         |         |
| Intercept        | 1.181    | 2.567      | 0.459   | 0.645    | -     | -37.627  | 6.755   | 105.256 |
| LST_12           | -0.134   | 0.085      | -1.571  | 0.115    | 2.803 | -4.539   | -0.208  | 0.775   |
| NDVI_12          | 2.214    | 1.253      | 1.767   | 0.077    | 2.043 | -23.980  | 0.088   | 37.968  |
| NDWI_12          | -12.617  | 5.445      | -2.317  | 0.020*   | 3.885 | -203.774 | -10.567 | 64.757  |
| RAIN_12          | 0.193    | 0.025      | 7.728   | <0.0001* | 1.157 | -2.620   | 0.130   | 1.087   |
