# Supplementary material for: Exploring the Relationship between Melioidosis Morbidity Rate and Local Environmental Indicators Using Remotely Sensed Data
Source: Preprints.org preprint supplement (doi:10.20944/preprints202404.0446.v1), 2024-04-05
Supplement: Supplementary file 3 [file supplementary]

Archive with 2 entries (2 files):
- Figure_Supplementary.pdf
- Supplementary Information.pdf
